# Supplementary material for: Overuse of Antidepressants in a Nationally Representative Adult Patient Population in 2005
Source: Atypon-hosted journal article supplement (doi:10.1176/ps.62.7.pss6207_0720), 2011-07-01
Supplement: Conti_ds.pdf [file Conti_ds.pdf]

| <b>Indications for the Use of Antidepressant Medications and Classes by Diagnosis and ICD-9 Code</b> |                                                                                                                                                                                                                 |                                                                                                                                                         |                 |                                                                          |                               |
|------------------------------------------------------------------------------------------------------|-----------------------------------------------------------------------------------------------------------------------------------------------------------------------------------------------------------------|---------------------------------------------------------------------------------------------------------------------------------------------------------|-----------------|--------------------------------------------------------------------------|-------------------------------|
|                                                                                                      |                                                                                                                                                                                                                 | <b>FDA APPROVED USES</b>                                                                                                                                |                 | <b>OFF LABEL USE WITH STRONG SCIENTIFIC SUPPORT</b>                      |                               |
| <b>Indicated Use</b>                                                                                 | <b>ICD-9 Codes, Description</b>                                                                                                                                                                                 | <b>Medications</b>                                                                                                                                      | <b>Classes</b>  | <b>Medications</b>                                                       | <b>Classes</b>                |
| Depression                                                                                           | 311 Depressive disorder, not elsewhere classified;<br>296.2 Major depressive disorder, single episode;<br>296.3 Major depressive disorder, recurrent episode;<br>300.4 Dysthymic disorder                       | amitriptyline;<br>imipramine;<br>trimipramine;<br>desipramine;<br>nortriptyline;<br>protriptyline;<br>phenelzine sulfate;<br>escitalopram               | All classes     | clomipramine hydrochloride;<br>fluoxetine;<br>mirtazepine;<br>sertraline | TCAs;<br>SSRIs<br>mirtazepine |
| Major Depression                                                                                     | 296.2 Major depressive disorder, single episode;<br>296.3 Major depressive disorder, recurrent episode;                                                                                                         | tranylcypromine;<br>duloxetine;<br>venlafaxine;<br>mirtazepine;<br>nefazodone;<br>bupropion;<br>citalopram;<br>fluoxetine;<br>paroxetine;<br>sertraline | All classes     |                                                                          |                               |
| Anxiety-Depression                                                                                   | 311 Depressive disorder, not elsewhere classified;<br>296.2 Major depressive disorder, single episode;<br>296.3 Major depressive disorder, recurrent episode;<br>300.4 Dysthymic disorder;<br>300.0 Anxiety NOS | doxepin                                                                                                                                                 | TCAs            | escitalopram;<br>mirtazepine                                             | SSRIs;<br>mirtazepine         |
| Generalized anxiety disorder                                                                         | 300.02 Generalized anxiety disorder                                                                                                                                                                             | duloxetine;<br>venlafaxine;<br>paroxetine;<br>escitalopam                                                                                               | SNRIs;<br>SSRIs |                                                                          |                               |

|                                    |                                                                                    |                                                                             |              |                                                                                                  |                           |
|------------------------------------|------------------------------------------------------------------------------------|-----------------------------------------------------------------------------|--------------|--------------------------------------------------------------------------------------------------|---------------------------|
| Obsessive compulsive disorder      | 300.3 Obsessive compulsive (neurosis) disorder                                     | clomipramine hydrochloride; fluoxetine; paroxetine; sertraline; fluvoxamine | TCAs; SSRIs  | venlafaxine; mirtazepine; citalopram; escitalopram                                               | SNRIs; SSRIs; mirtazepine |
| Panic disorder                     | 3001.01 Panic disorder without agoraphobia; 300.21 Panic disorder with agoraphobia | venlafaxine; fluoxetine; paroxetine; sertraline                             | SNRIs; SSRIs | clomipramine hydrochloride; imipramine; phenelzine sulfate; mirtazepine; citalopram; fluvoxamine | TCAs; SSRIs; mirtazepine  |
| Social phobia                      | 300.23 Social phobia                                                               | venlafaxine; paroxetine; sertraline; fluvoxamine                            | SNRIs; SSRIs | phenelzine sulfate                                                                               | MAOIs                     |
| Bulimia nervosa                    | 307.51 Bulimia nervosa                                                             | phenelzine sulfate; fluoxetine                                              | MAOIs; SSRIs | imipramine; venlafaxine; fluvoxamine                                                             | TCAs; SNRIs; SSRIs        |
| Post traumatic stress disorder     | 309.81 Post traumatic stress disorder                                              | paroxetine; sertraline                                                      | SSRIs        | venlafaxine; fluoxetine                                                                          | SNRIs, SSRIs              |
| Headache treatment and prophylaxis | 784.0 Headache; 346.0-346.9 Migraine                                               |                                                                             |              | amitriptyline                                                                                    | TCAs                      |
| Tobacco dependence, cessation      | 305.1 Tobacco use disorder                                                         | bupropion                                                                   | bupropion    | nortriptyline                                                                                    | TCAs                      |
| Diabetic neuropathy                | 250.6 Diabetes with neurological manifestations; 357.2 Polyneuropathy in diabetes  |                                                                             |              | imipramine; desipramine; duloxetine; venlafaxine; fluoxetine                                     | TCAs; SNRIs; SSRIs        |
| Fibromyalgia                       | 729.1 Fibromyalgia                                                                 | duloxetine                                                                  | SNRI         | fluoxetine; paroxetine                                                                           | TCAs; SSRIs; SNRIs        |
| Postherpetic neuralgia             | 053.12 Postherpetic neuralgia                                                      |                                                                             |              | amitriptyline; nortriptyline                                                                     | TCAs; SSRIs; SNRIs        |

|                                      |                                                                                                       |  |  |                                                          |                          |
|--------------------------------------|-------------------------------------------------------------------------------------------------------|--|--|----------------------------------------------------------|--------------------------|
| Perimenopausal symptoms/<br>disorder | 627.2 Symptomatic menopausal states, such as flushing, sleeplessness, headache, lack of concentration |  |  | venlafaxine;<br>fluoxetine;<br>citalopram;<br>paroxetine | SNRIs;<br>SSRIs          |
| Pain                                 | 331 Osteitis deformans and osteopathies associated with other disorders classified elsewhere          |  |  | amitriptyline;<br>clomipramine<br>hydrochloride          | TCAs                     |
|                                      | 356 Hereditary and idiopathic peripheral neuropathy;                                                  |  |  |                                                          | TCAs;<br>SNRIs;<br>SSRIs |
|                                      | 357 Inflammatory and toxic neuropathy;                                                                |  |  |                                                          | TCAs;<br>SNRIs;<br>SSRIs |
|                                      | 358.00-358.9 myoneural disorders;                                                                     |  |  |                                                          | TCAs;<br>SNRIs;<br>SSRIs |
|                                      | 359.0-359.1 muscular dystrophies;                                                                     |  |  |                                                          | TCAs                     |
|                                      | 359.2-359.9 myopathies;                                                                               |  |  |                                                          | TCAs;<br>SNRIs;<br>SSRIs |
|                                      | 720 Ankylosing spondylitis and other inflammatory spondylopathies;                                    |  |  |                                                          | TCAs                     |
|                                      | 721 Spondylosis and allied disorders;<br>722 Intervertebral disc disorders;                           |  |  |                                                          | TCAs                     |
|                                      | 723 Other disorders of cervical region;<br>724 Other and unspecified disorders of back;               |  |  |                                                          | TCAs                     |
|                                      | 725 Polymyalgia rheumatica;                                                                           |  |  |                                                          | TCAs                     |
|                                      | 729.1 Myalgia and myositis, unspecified;                                                              |  |  |                                                          | TCAs;<br>SNRIs;<br>SSRIs |

|  |                                                          |  |  |  |                           |
|--|----------------------------------------------------------|--|--|--|---------------------------|
|  | 729.2 Neuralgia, neuritis, and radiculitis, unspecified; |  |  |  | TCA's;<br>SNRIs;<br>SSRIs |
|  | 732 Osteochondropathies                                  |  |  |  | TCA's                     |

Data Sources: Physicians Desk Reference, Micromedex DrugDx System,

Multum.
